# Supplementary material for: Effects of substituent groups on the structures and luminescence properties of 2D/3D CdII complexes with mixed rigid and flexible carboxylate ligands
Source: Royal Society of Chemistry journal article supplement (doi:10.1039/c4ra04755a), 2014-01-01
Supplement: c4ra04755a1.pdf [file c4ra04755a1.pdf]

## Supporting Information

### **Effect of Substituent Groups on Crystal Structures and Luminescence Properties of 2D/3D Cd<sup>II</sup> Complexes with Mixed Rigid and Flexible Carboxylate Ligands**

Guo-Yun Wu,<sup>a</sup> Yi-Xia Ren,<sup>ab</sup> Zheng Yin,<sup>a</sup> Feng Sun,<sup>a</sup> Ming-Hua Zeng<sup>\*a</sup> and

Mohamedally Kurmoo<sup>c</sup>

<sup>a</sup> Key Laboratory for the Chemistry and Molecular Engineering of Medicinal Resources (Ministry of Education of China), School of Chemistry and Pharmaceutical Sciences, Guangxi Normal University, Guilin 541004, P. R. China, E-mail: [zmh@mailbox.gxnu.edu.cn](mailto:zmh@mailbox.gxnu.edu.cn)

<sup>b</sup> College of Chemistry and Chemical Engineering, Shaanxi Key Laboratory of Chemical Reaction Engineering, Yan'an University, Yan'an 716000, P. R. China

<sup>c</sup> Institut de Chimie de Strasbourg, Université de Strasbourg, CNRS-UMR 7177, 4 rue Blaise Pascal, CS 90032, 67081 Strasbourg Cedex, France, E-mail: [kurmoo@inistra.fr](mailto:kurmoo@inistra.fr)

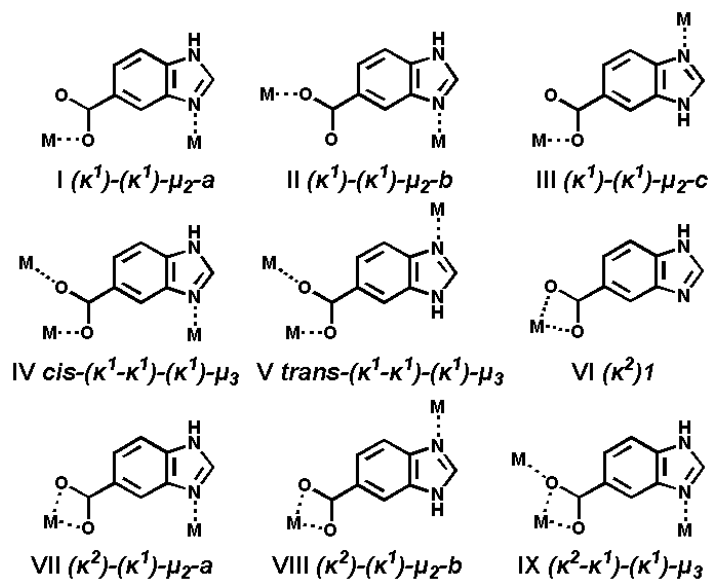

Chart S1. The coordination modes of the Hbic ligand.

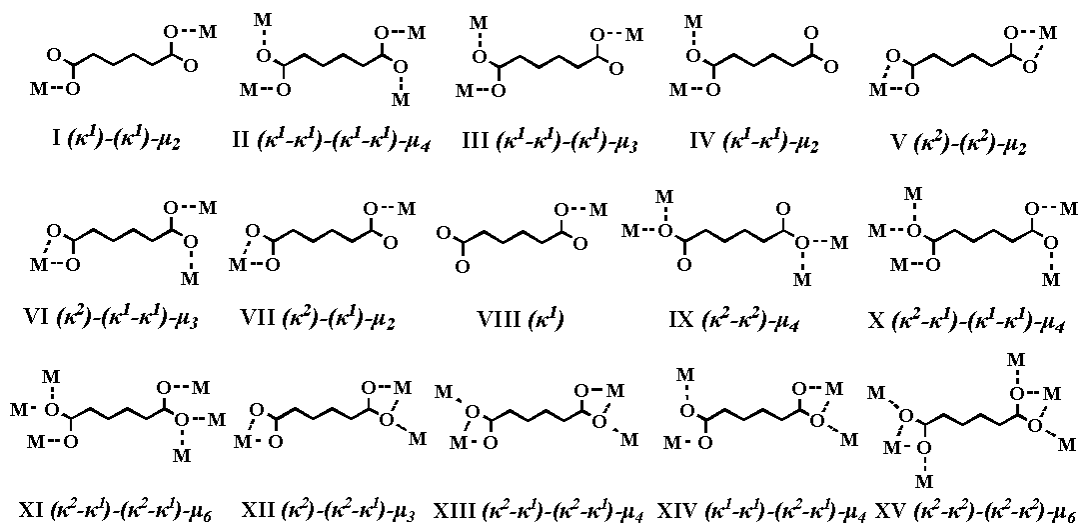

Chart S2. Reported coordination modes of adipate.

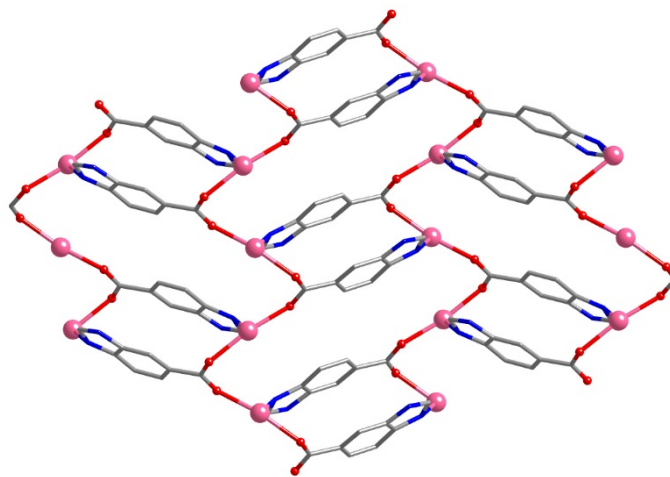

**Figure S1.** The 2D structure based on bic ligand in complex **1**.

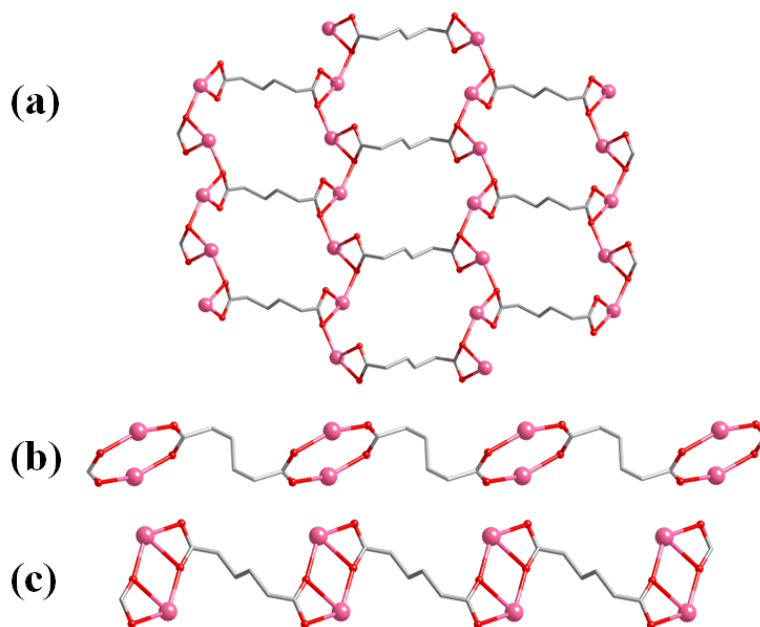

**Figure S2.** The 1D/2D structures based on  $\text{adp}^{2-}$  ion of complexes **1(a)**, **2(b)** and **3(c)**.

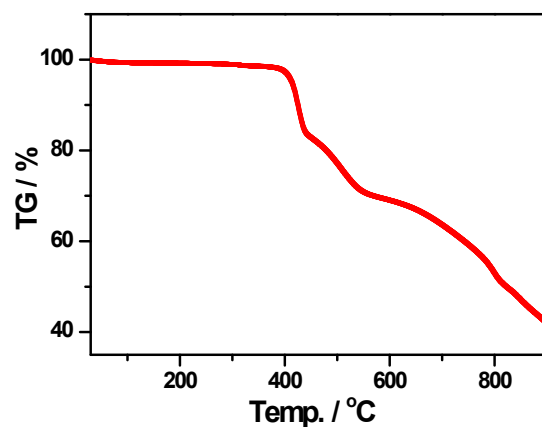

**Figure S3.** (a) The TG curves of complex 1 in flowing N<sub>2</sub> at a heating rate of 10 °C/min in the temperature range 30 - 900 °C.

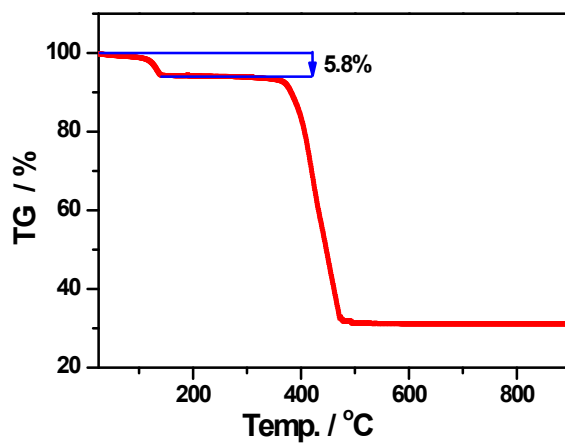

**Figure S3.** (b) The TG curves of complex 2 in flowing N<sub>2</sub> at a heating rate of 10 °C/min in the temperature range 30 - 900 °C.

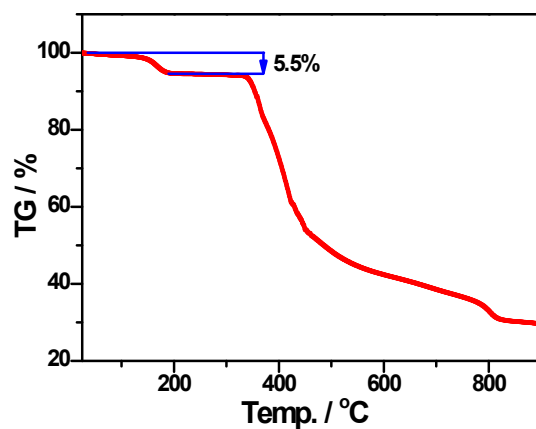

**Figure S3.** (c) The TG curves of complex 3 in flowing N<sub>2</sub> at a heating rate of 10 °C/min in the temperature range 30 - 900 °C.

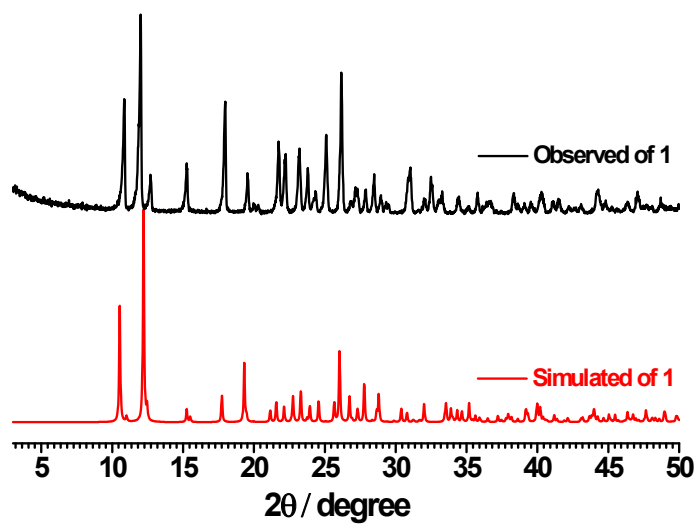

Figure S4. (a) XRPD pattern of 1 compared to that simulated from single crystal data of 1.

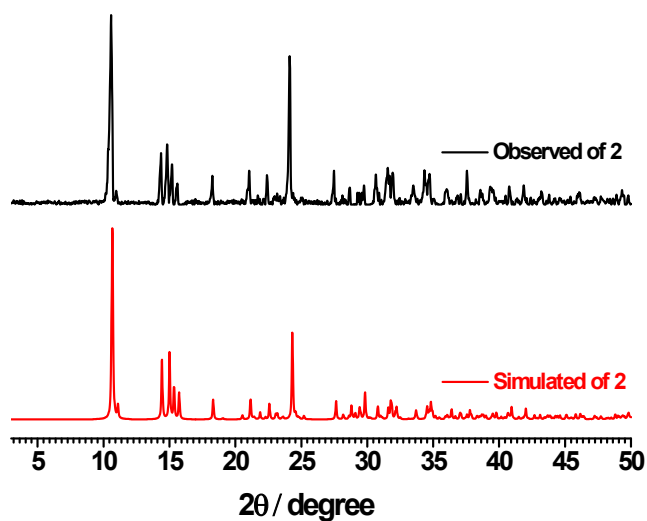

Figure S4. (b) XRPD pattern of 2 compared to that simulated from single crystal data of 2.

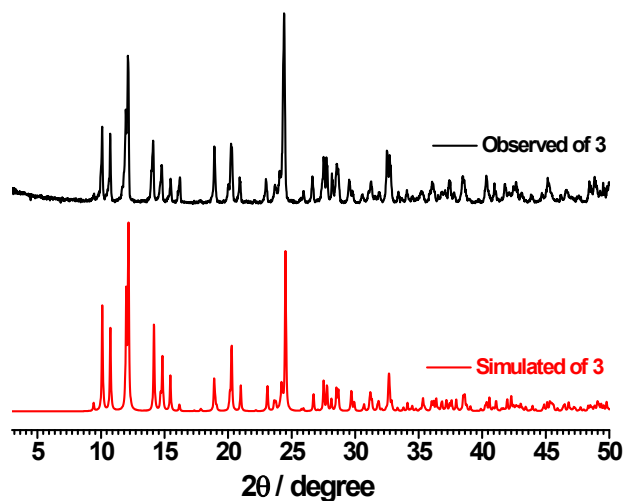

**Figure S4.** (c) XRPD pattern of **3** compared to that simulated from single crystal data of **3**.
